# Supplementary material for: Recommender System Based on Collaborative Filtering for Personalized Dietary Advice: A Cross-Sectional Analysis of the ELSA-Brasil Study
Source: Int J Environ Res Public Health. 2022 Nov 13;19(22):14934. doi: 10.3390/ijerph192214934 (PMC9690822; doi:10.3390/ijerph192214934)
Supplement: Supplementary file 1 [file ijerph-19-14934-s001.zip › ijerph-1989349-supplementary.pdf]

## Supplementary Material

**Table S1.** Food groups and list of items eligible as recommendations, Brazilian Longitudinal Study of Adult Health (ELSA-Brasil), 2008-2010.

|    | Food groups             | Foods                                                                                                                                                                                                                                                                                                                                          | Recommender |
|----|-------------------------|------------------------------------------------------------------------------------------------------------------------------------------------------------------------------------------------------------------------------------------------------------------------------------------------------------------------------------------------|-------------|
| 1  | Refined cereals         | White rice, refined grains, corn, and breakfast cereals                                                                                                                                                                                                                                                                                        |             |
| 2  | Whole cereals           | Whole-grain rice, oats, granola, whole cereals, and whole meal bread                                                                                                                                                                                                                                                                           | X           |
| 3  | Tubers and roots        | Potato (stewed, boiled or mashed), boiled cassava, yam, sweet potato, fried potato, cassava, polenta, sweet potato, farofa (cassava flour with complements), cornmeal cuscus; cassava flour and corn flour                                                                                                                                     | X           |
| 4  | Breads                  | Bread, rolls, light bread, pita bread, and simple cake                                                                                                                                                                                                                                                                                         |             |
| 5  | Confectionery           | Sweets, caramels, cereal bar, sweet biscuit with filling, cake with filling, sweet bread, tart, trifle, chocolate bar, bonbons, chocolates, chocolate powder, chocolate drink, cappuccino, milk pudding, milk sweet, mousse, jelly, jam, fruit sweets, honey, syrup, sweet bread, fruit ice lolly, fruit salad with complements, and ice cream |             |
| 6  | Beans and other legumes | Beans (black, red, white, cowpeas, etc.), lentils, chickpeas and peas                                                                                                                                                                                                                                                                          | X           |
| 7  | Oilseeds                | Walnuts, cashew nuts, Brazil nuts, peanuts, almonds and pistachio nuts                                                                                                                                                                                                                                                                         | X           |
| 8  | Fruits                  | Avocado, pineapple, banana, persimmon, jack, pine nut, guava; orange, tangerine, apple, pear; papaya, mango, watermelon, melon, strawberry, and fruit salad without complements                                                                                                                                                                | X           |
| 9  | Vegetables              | Zucchini, chayote, eggplant, pumpkin, lettuce, garlic, beetroot, broccoli, onion, carrot, chicory, watercress, arugula, raw collards, raw spinach, escarole, braised collards, braised spinach, cauliflower, okra, tomato, runner beans, vegetable soup                                                                                        | X           |
| 10 | Red meats               | Boned beef (steak, minced meat and stewed meat), beef on the bone (rib, oxtail), pork, tripe, liver, offal, and stroganoff                                                                                                                                                                                                                     |             |
| 11 | White meats and fish    | Boiled chicken, fried chicken, chicken breast, boiled, baked or grilled fish, fried fish, shrimp, shellfish, crab, swimming crab, sardine, and tuna                                                                                                                                                                                            | X           |

|    |                                   |                                                                                                                                                                                                                                                                                                                                                                                                                                           |   |
|----|-----------------------------------|-------------------------------------------------------------------------------------------------------------------------------------------------------------------------------------------------------------------------------------------------------------------------------------------------------------------------------------------------------------------------------------------------------------------------------------------|---|
| 12 | Processed meats                   | Sausage, light cold meats (turkey sausage, turkey breast), ham, mortadella, salami, and bacon                                                                                                                                                                                                                                                                                                                                             |   |
| 13 | Eggs                              | Fried egg, omelet, scrambled egg, and boiled and poached egg                                                                                                                                                                                                                                                                                                                                                                              |   |
| 14 | High-fat dairy products and milk  | Full-cream yogurt, full-cream dairy milk, yellow cheeses, and full-cream cheese spread,                                                                                                                                                                                                                                                                                                                                                   |   |
| 15 | Lower-fat dairy products and milk | Light yogurt, semiskimmed dairy milk, skimmed dairy milk, white cheeses, and light cheese spread                                                                                                                                                                                                                                                                                                                                          | X |
| 16 | Oils and fats                     | Margarine, butter, mayonnaise, and light mayonnaise                                                                                                                                                                                                                                                                                                                                                                                       |   |
| 17 | Pasta                             | Macaroni, macaroni dishes, and instant macaroni                                                                                                                                                                                                                                                                                                                                                                                           |   |
| 18 | Salted snacks                     | Hotdog, popcorn, fried and baked savories, pizza, and instant soup                                                                                                                                                                                                                                                                                                                                                                        |   |
| 19 | Juices and other beverages        | Coffee with sugar, coffee with sweetener, coffee with no sugar, mate with sugar, mate with sweetener, sugar-free mate, soy extract, artificial juice with sugar, artificial juice with sweetener, sugar-free artificial juice, industrialized juice with sugar, industrialized juice with sweetener, sugar-free industrialized juice, natural juice with sugar, natural juice with sweetener, sugar-free natural juice, and coconut water |   |
| 20 | Soft drinks                       | Soft drinks, and diet/light soft drinks                                                                                                                                                                                                                                                                                                                                                                                                   |   |
| 21 | Alcoholic beverages               | Beer, wine, and distilled beverages                                                                                                                                                                                                                                                                                                                                                                                                       |   |
